# Supplementary material
Source: publisher site journal article supplement (https://www.dovepress.com/article/453543)
Supplement: Supplementary file 1 [file get_supplementary_file.php]

**Supplement Table 1** Baseline characteristics of healthy persons and T2DM patients

| Characteristics | Healthy persons (n=100) | T2DM patients (n=570) |
| --- | --- | --- |
| Sex (M/F) | 13/87 | 305/265 |
| Smoking | - | 148 (26.0%) |
| Drinking (*n* (%)) | - | 178 (31.2%) |
| Age (years) | 36 (35-38) | 61 (60-62) *** |
| Duration of diabetes (years) | - | 9.867 (9.289-10.444) |
| Height (cm) | 159.6 (158.4-160.8) | 160.9 (160.2-161.7) |
| BW (Kg) | 53.9 (52.7-55.0) | 64.6 (63.7-65.6) *** |
| BMI (kg/m2) | 21.12 (20.75-21.49) | 24.87 (24.58-25.16) *** |
| SBP (mmHg) | 111 (109-114) | 140 (138-142) *** |
| DBP (mmHg) | 69 (67-71) | 79 (78-80) *** |
| Heart Rate | 80 (78-82) | 77 (76-78) * |
| Glucose (mmol/L) | 4.71 (4.62-4.80) | 13.56 (13.00-14.13) *** |
| Lactate (mmol/L) | 2.48 (2.38-2.58) | 2.89 (2.82-2.96) *** |
| TC (mmol/L) | 4.70 (4.58-4.83) | 4.63 (4.49-4.76) |
| TG (mmol/L) | 0.90 (0.85-0.96) | 2.22 (2.04-2.41) *** |
| HDL-C (mmol/L) | 1.59 (1.54-1.65) | 1.13 (1.11-1.16) *** |
| LDL-C (mmol/L) | 2.66 (2.56-2.75) | 2.71 (2.63-2.79) |
| Urea (mmol/L) | 4.97 (4.74-5.20) | 6.76 (6.55-6.98) *** |
| UA (μmol/L) | 276.4 (266.2-286.7) | 335.0 (327.4-342.7) *** |
| Crea (μmol/L) | 62.9 (60.1-65.6) | 77.5 (73.6-81.3) *** |
| GFR (mL/min) | 108.0 (105.0-110.9) | 89.2 (87.1-91.3) *** |
| ALBU (mg/L) | 9.077 (7.740-10.415) | 220.040 (172.429-267.652) *** |
| UACR (mg/gcr) | 8.4 (7.2-9.6) | 392.7 (280.4-505.0) *** |
| ALT (U/L) | 16.8 (15.3-18.3) | 24.6 (23.4-25.7) *** |
| AST (U/L) | 20.0 (19.2-20.9) | 22.0 (21.3-22.7) *** |
| WBC (10^9/L) | 5.45 (5.22-5.69) | 6.61 (6.47-6.74) *** |
| NEU-R (%) | 58.4 (56.8-60.0) | 64.3 (63.6-65.0) *** |
| LYM-R (%) | 33.0 (31.5-34.5) | 26.7 (26.1-27.3) *** |
| MONO-R (%) | 5.6 (5.3-5.8) | 6.1 (5.9-6.2) ** |
| RBC (10^12/L) | 4.53 (4.45-4.60) | 4.56 (4.41-4.70) |
| HGB (g/L) | 134 (132-137) | 135 (134-137) |
| PLT (10^9/L) | 230 (221-240) | 207 (202-212) *** |

Normal distribution continuous variables were described by mean ± standard, non-normal distribution continuous variables were described by mean (95% confidence interval (CI)), and Categorial variables were expressed as *n* (%). ****p*<0.001, ***p*<0.01, **p*<0.05 compared with healthy persons.

**Abbreviations:** T2DM, type 2 diabetes mellitus; BW, body weight; BMI, body mass index; SBP, systolic blood pressure; DBP, diastolic blood pressure; TC, total cholesterol; TG, triglyceride; HDL-C, high density lipoprotein cholesterol; LDL-C, low density lipoprotein cholesterol; UA, uric acid; Crea, creatinine; GFR, glomerular filtration rate; ALBU, albumin in urine; UACR, urine albumin-to-creatinine ratio; ALT, alanine aminotransferase; AST, aspartate aminotransferase; WBC, white blood cell count; NEU-R, neutrophil cell rate; LYM-R, lymphocyte rate; MONO-R, monocyte rate; RBC, red blood cell count; HGB, hemoglobin; PLT, platelet count.
